# Supplementary material for: The transcription factor CBFB suppresses breast cancer through orchestrating translation and transcription
Source: PubMed Central journal article supplement (PMC6502810; doi:10.1038/s41467-019-10102-6), 2019-05-06
Supplement: 41467_2019_10102_MOESM3_ESM.pdf [file 41467_2019_10102_MOESM3_ESM.pdf]

## **Description of Additional Supplementary Files**

File Name: Supplementary Data 1

Description: CFBF interacting proteins identified by mass spectrometry.

File Name: Supplementary Data 2

Description: Oligo information.
