# Supplementary material for: The transcription factor CBFB suppresses breast cancer through orchestrating translation and transcription
Source: PubMed Central journal article supplement (PMC6502810; doi:10.1038/s41467-019-10102-6), 2019-05-06
Supplement: 41467_2019_10102_MOESM6_ESM.pdf [file 41467_2019_10102_MOESM6_ESM.pdf]

## Reporting Summary

Nature Research wishes to improve the reproducibility of the work that we publish. This form provides structure for consistency and transparency in reporting. For further information on Nature Research policies, see [Authors & Referees](#) and the [Editorial Policy Checklist](#).

### Statistical parameters

When statistical analyses are reported, confirm that the following items are present in the relevant location (e.g. figure legend, table legend, main text, or Methods section).

n/a | Confirmed

- The exact sample size ( $n$ ) for each experimental group/condition, given as a discrete number and unit of measurement
- An indication of whether measurements were taken from distinct samples or whether the same sample was measured repeatedly
- The statistical test(s) used AND whether they are one- or two-sided  
*Only common tests should be described solely by name; describe more complex techniques in the Methods section.*
- A description of all covariates tested
- A description of any assumptions or corrections, such as tests of normality and adjustment for multiple comparisons
- A full description of the statistics including central tendency (e.g. means) or other basic estimates (e.g. regression coefficient) AND variation (e.g. standard deviation) or associated estimates of uncertainty (e.g. confidence intervals)
- For null hypothesis testing, the test statistic (e.g.  $F$ ,  $t$ ,  $r$ ) with confidence intervals, effect sizes, degrees of freedom and  $P$  value noted  
*Give  $P$  values as exact values whenever suitable.*
- For Bayesian analysis, information on the choice of priors and Markov chain Monte Carlo settings
- For hierarchical and complex designs, identification of the appropriate level for tests and full reporting of outcomes
- Estimates of effect sizes (e.g. Cohen's  $d$ , Pearson's  $r$ ), indicating how they were calculated
- Clearly defined error bars  
*State explicitly what error bars represent (e.g.  $SD$ ,  $SE$ ,  $CI$ )*

*Our web collection on [statistics for biologists](#) may be useful.*

### Software and code

Policy information about [availability of computer code](#)

Data collection

RNA or DNA samples or were sent to NCI next generation sequencing facility to generate libraries and sequenced on HiSeq2500 or NextSeq. Data were collected using standard Illumina protocol and procedure.

Data analysis

We used the public available DESeq algorithm (Love, M. I., Huber, W. & Anders, S. Moderated estimation of fold change and dispersion for RNA-seq data with DESeq2. *Genome Biol* 15, 550, doi:10.1186/s13059-014-0550-8, 2014) to analyze RNAseq and RIPseq data. For RNAseq, we used FDR=0.05 and fold change at 2 unless specifically indicated in the manuscript. For RIPseq, we used FDR=0.05, fold change at 4 as cutoffs. ChIPseq analysis was done using the algorithm in Zhang et al. Model-based Analysis of ChIP-Seq (MACS). *Genome Biol* (2008) vol. 9 (9) pp. R137.

For manuscripts utilizing custom algorithms or software that are central to the research but not yet described in published literature, software must be made available to editors/reviewers upon request. We strongly encourage code deposition in a community repository (e.g. GitHub). See the Nature Research [guidelines for submitting code & software](#) for further information.

## Data

Policy information about [availability of data](#)

All manuscripts must include a [data availability statement](#). This statement should provide the following information, where applicable:

- Accession codes, unique identifiers, or web links for publicly available datasets
- A list of figures that have associated raw data
- A description of any restrictions on data availability

Genomic data were submitted to the Gene Expression Omnibus (GEO) database with an accession number: GSE119131 (Polysome profiling), GSE120216 (RNAseq of CBFβ WT, KO, RUNX1 WT and KO), GSE119800 (RIPseq of CBFβ and hnRNPK), GSE129314 (ChIPseq of RUNX1).

## Field-specific reporting

Please select the best fit for your research. If you are not sure, read the appropriate sections before making your selection.

Life sciences  Behavioural & social sciences  Ecological, evolutionary & environmental sciences

For a reference copy of the document with all sections, see [nature.com/authors/policies/ReportingSummary-flat.pdf](https://www.nature.com/authors/policies/ReportingSummary-flat.pdf)

## Life sciences study design

All studies must disclose on these points even when the disclosure is negative.

|                 |                                                                                                                                                                                                                                                                                                                                                                                                                                                                                            |
|-----------------|--------------------------------------------------------------------------------------------------------------------------------------------------------------------------------------------------------------------------------------------------------------------------------------------------------------------------------------------------------------------------------------------------------------------------------------------------------------------------------------------|
| Sample size     | For in vitro experiments, such as RIP, ribosomal profiling, and realtime PCR, we performed three biological repeats. For in vivo experiments, we normally included at least 5 mice for each group. For xenografted experiment using MCF7 cells, we included 10 mice for each group based on previous studies.                                                                                                                                                                              |
| Data exclusions | No data were excluded unless the positive control, if available, failed, which indicates experiment failure.                                                                                                                                                                                                                                                                                                                                                                               |
| Replication     | We took measures to increase the reproducibility of our findings. Replications were successful. 1) We performed three biological replicates for experiments that require statistical analyses. 2) When possible, we used two independent approaches to address the same questions. For example, binding motif of hnRNPK in the RUNX1 mRNA was identified using biochemical approaches and validated with publicly available eCLIP data. RIP data were validated by un-biased RIP-seq data. |
| Randomization   | For in vivo xenograft studies, female mice with same age were randomly assigned to each group.                                                                                                                                                                                                                                                                                                                                                                                             |
| Blinding        | In vitro experiments were not blinding. Xenografting experiment involving MCF7 cells was blind. The person who measured tumor size did not know the genotypes of tumor cells.                                                                                                                                                                                                                                                                                                              |

## Reporting for specific materials, systems and methods

### Materials & experimental systems

| n/a                                 | Involved in the study                                           |
|-------------------------------------|-----------------------------------------------------------------|
| <input type="checkbox"/>            | <input checked="" type="checkbox"/> Unique biological materials |
| <input type="checkbox"/>            | <input checked="" type="checkbox"/> Antibodies                  |
| <input type="checkbox"/>            | <input checked="" type="checkbox"/> Eukaryotic cell lines       |
| <input checked="" type="checkbox"/> | <input type="checkbox"/> Palaeontology                          |
| <input type="checkbox"/>            | <input checked="" type="checkbox"/> Animals and other organisms |
| <input checked="" type="checkbox"/> | <input type="checkbox"/> Human research participants            |

### Methods

| n/a                                 | Involved in the study                           |
|-------------------------------------|-------------------------------------------------|
| <input type="checkbox"/>            | <input checked="" type="checkbox"/> ChIP-seq    |
| <input checked="" type="checkbox"/> | <input type="checkbox"/> Flow cytometry         |
| <input checked="" type="checkbox"/> | <input type="checkbox"/> MRI-based neuroimaging |

## Unique biological materials

Policy information about [availability of materials](#)

Obtaining unique materials In this study, we generated several CRISPR-based knockout of CBFβ, RUNX1 and Notch3 in MCF10A cells. These cell lines will be available to the scientific community upon request if shipping cost is provided by requesters.

## Antibodies

|                 |                                                                                                                                                                                                                                                                                                                                                                                                                                                                                                                                                                                                                                                                                                                                                                                                                                                                                                                                                                                                                                                                                                                                                                   |
|-----------------|-------------------------------------------------------------------------------------------------------------------------------------------------------------------------------------------------------------------------------------------------------------------------------------------------------------------------------------------------------------------------------------------------------------------------------------------------------------------------------------------------------------------------------------------------------------------------------------------------------------------------------------------------------------------------------------------------------------------------------------------------------------------------------------------------------------------------------------------------------------------------------------------------------------------------------------------------------------------------------------------------------------------------------------------------------------------------------------------------------------------------------------------------------------------|
| Antibodies used | For immunoblotting following antibodies were used: p53 (DO1 Santa Cruz, Cat:Sc-126, 1:1000), CBFβ (Bethyl, Cat:A303-547A, 1:1000), RUNX1 (Cell signaling, Cat:4334s,1:1000), RUNX2 (cell signaling, Cat:8486 ,1:1000), RUNX3 (Cell signaling, Cat: 9647S ,1:1000), HnRNPK (Bethyl, Cat: A303-674A, 1:1000), NOTCH3 (cell signaling, Cat:5276s , 1:1000), p73 (Abcam, Cat:ab40658, 1:1000), LC3A/B (cell signaling, Cat:12741s, 1:1000), β actin (Sigma, Cat:A5316, 1:5000), H3 (Millipore, Cat:07-690: ,1:5000), GAPDH (Abcam, Cat:ab9484, 1:5000). For Chromatin immunoprecipitation (ChIP), we used following antibodies: p53 (DO1, Santa Cruz, Cat: Sc126, 10 µg) and RUNX1 (Abcam, Cat: Ab23980,10 µg). For Immunohistochemistry (IHC), we used antibodies for CBFβ (Bethyl, Cat: A393-549A, 1:100) and RUNX1 (Abcam, Cat: Ab23980,1:100). For Immunofluorescence (IFC), we used following antibodies: CBFβ (Bethyl, Cat: A303-549A, 1:1000) and RUNX1(Abcam, Cat: Ab23980,1:1000). For RNA immunoprecipitation (RIP) we used antibodies: CBFβ (Bethyl, Cat: A303-549A, 1µg), HnRNPK (Bethyl, Cat: A303-674A, 1µg), and HnRNPL (Bethyl, Cat: A311-423A, 1µg). |
| Validation      | Key antibodies were validated using knockout cell lines or knockdown. For example, CBFβ antibody was validated using CRISPR-based knockout cell lines. hnRNPK antibody was validated using siRNA-based knockdown.                                                                                                                                                                                                                                                                                                                                                                                                                                                                                                                                                                                                                                                                                                                                                                                                                                                                                                                                                 |

## Eukaryotic cell lines

Policy information about [cell lines](#)

|                                                                   |                                                                                                                                                                                    |
|-------------------------------------------------------------------|------------------------------------------------------------------------------------------------------------------------------------------------------------------------------------|
| Cell line source(s)                                               | Most cell lines were from American Type Culture collection (ATCC) and MCF7 cell line was from Michael G. Brattain. MCF12A cells were a kind gift from Stefan Ambs (NIH, Bethesda). |
| Authentication                                                    | MCF7 cells were authenticated by short terminal repeat (STR) analysis.                                                                                                             |
| Mycoplasma contamination                                          | All cell lines were tested negative for mycoplasma contamination.                                                                                                                  |
| Commonly misidentified lines (See <a href="#">ICLAC</a> register) | Not Applicable                                                                                                                                                                     |

## Animals and other organisms

Policy information about [studies involving animals](#); [ARRIVE guidelines](#) recommended for reporting animal research

|                         |                                                                                                                                                                                                                                                           |
|-------------------------|-----------------------------------------------------------------------------------------------------------------------------------------------------------------------------------------------------------------------------------------------------------|
| Laboratory animals      | NSG mice were from the Jackson Laboratory (JAX,005557, NOD.Cg-Prkdcscid, l12rgtm1Wjl/Szj); athymic nu/nu mice (Nude mice) were from internal breeding at Center for Cancer Research in NCI.                                                               |
| Wild animals            | No wild animals were used in this study.                                                                                                                                                                                                                  |
| Field-collected samples | <i>For laboratory work with field-collected samples, describe all relevant parameters such as housing, maintenance, temperature, photoperiod and end-of-experiment protocol OR state that the study did not involve samples collected from the field.</i> |

## ChIP-seq

### Data deposition

- Confirm that both raw and final processed data have been deposited in a public database such as [GEO](#).
- Confirm that you have deposited or provided access to graph files (e.g. BED files) for the called peaks.

|                                                                    |                                                                                                                                         |
|--------------------------------------------------------------------|-----------------------------------------------------------------------------------------------------------------------------------------|
| Data access links<br><i>May remain private before publication.</i> | <a href="https://www.ncbi.nlm.nih.gov/geo/query/acc.cgi?acc=GSE129314">https://www.ncbi.nlm.nih.gov/geo/query/acc.cgi?acc=GSE129314</a> |
| Files in database submission                                       | GSM3704447 for MCF10A cells_Input DNA, GSM3704448 for MCF10A cells_RUNX1 ChIPseq                                                        |
| Genome browser session<br>(e.g. <a href="#">UCSC</a> )             | no longer applicable                                                                                                                    |

### Methodology

|                         |                                                                                                                                          |
|-------------------------|------------------------------------------------------------------------------------------------------------------------------------------|
| Replicates              | 1 repeat                                                                                                                                 |
| Sequencing depth        | GSM3704447, total reads, 96132262, uniquely mapped reads, 69818605<br>GSM3704448, total reads, 91726821, uniquely mapped reads, 66238355 |
| Antibodies              | RUNX1 (Abcam, Cat: Ab23980,10 µg)                                                                                                        |
| Peak calling parameters | callpeak -t CHNM36.bam.sorted.bam -c CHNM35.bam.sorted.bam -f BAM -n RUNX1ChIP_MCF10A0E0.05 -g hs -B -q 0.05                             |
| Data quality            | Using the peak calling parameters above, we have detected about 13,000 peaks. The data quality is only average compared                  |

Data quality

to the ChIPseqs performed in our laboratory. The main reason could be either that our RUNX1 antibody (the best among the several tested) has low affinity (technical reason) and/or that RUNX1 does not bind to chromatin strongly as majority of its binding partner CBFβ is in the cytoplasm. Previous studies demonstrated that CBFβ enhances RUNX1 chromatin binding (biological reason).

Software

We used published the MACS algorithm described in Y. Zhang, T. Liu, C. A. Meyer, J. Eeckhoute, D. S. Johnson, B. E. Bernstein, C. Nusbaum, R. M. Myers, M. Brown, W. Li and X. S. Liu. Model-based Analysis of ChIP-Seq (MACS) Genome Biology 2008.
